# Supplementary material for: Connecting Coil-to-Globule Transitions to Full Phase Diagrams for Intrinsically Disordered Proteins
Source: PubMed Central journal article supplement — Biophys J. 2020 Jun 23;119(2):402–18. doi: 10.1016/j.bpj.2020.06.014 (PMC7376131; doi:10.1016/j.bpj.2020.06.014), 2020-06-23
Supplement: mmc1.pdf [file mmc1.pdf]

**Biophysical Journal, Volume 119**

**Supplemental Information**

**Connecting Coil-to-Globule Transitions to Full Phase Diagrams for Intrinsically Disordered Proteins**

**Xiangze Zeng, Alex S. Holehouse, Ashutosh Chilkoti, Tanja Mittag, and Rohit V. Pappu**

**GaussianClusterV2.0.zip** is a zip archive of the commented MATLAB code and the data files used to extract system-specific phase diagrams using our adaptation of the Gaussian Cluster Theory. All relevant details are found within the README file in the archive.

**Figure S1: Pseudo code for extracting  $B$ , and  $w$**

Two approaches were developed to extract  $B$ , and  $w$  based on analysis of  $\sqrt{\langle R_g^2 \rangle}$  versus  $T$  that we obtain from simulations. In Approach 1, we set  $\frac{(T^* - T_\theta)}{T^*} Bn_K^{0.5} = -0.35$  irrespective of the value of  $w$ . In Approach, the choice of  $\frac{(T^* - T_\theta)}{T^*} Bn_K^{0.5}$  is coupled to the choice made for  $w$ , although the equality used in Approach 1 provides bounds on the value for  $\frac{(T^* - T_\theta)}{T^*} Bn_K^{0.5}$ . The relation between  $\frac{(T^* - T_\theta)}{T^*} Bn_K^{0.5}$  and  $w$  is obtained by numerically calculating the saddle point of the contraction ratio profile from GCT at different values for  $w$ . These two approaches give very similar results and the choice of approaches does not affect our conclusions. The pseudo code for approaches 1 and 2 is referenced as **Figure S1** in the main text.

**A. Pseudo code for Approach 1:**

for  $T^*$  in  $[T_{\min}, T_\theta]$ , where  $T_{\min}$  is the lowest simulation temperature:  
do

get  $B$  based on  $\frac{(T^* - T_\theta)}{T^*} Bn_K^{0.5} = -0.35$ ;

convert the simulated of  $\sqrt{\langle R_g^2 \rangle}$  versus  $T$  curve to a contraction ratio profile as a function  $\tau Bn_K^{0.5}$  and denote it as  $\alpha_s^{\text{sim}}(\tau Bn_K^{0.5})$ ;

Next, perform a parameter scan for  $w$ ;

For  $w$  in  $[w_{\min}, w_{\max}]$  ( $[0.001, 0.04]$  has proven to be sufficient)  
do

Get the contraction ratio profile  $\alpha_s^{\text{GCT}}(\tau Bn_K^{0.5})$

Compute the difference between  $\alpha_s^{\text{sim}}(\tau Bn_K^{0.5})$  and  $\alpha_s^{\text{GCT}}(\tau Bn_K^{0.5})$ ;

Since the minimum of  $\alpha_s^{\text{GCT}}(\tau Bn_K^{0.5})$  always larger than the minimum of

$\alpha_s^{\text{sim}}(\tau Bn_K^{0.5})$ , a scaling factor  $\lambda$  is used to best  $\alpha_s^{\text{sim}}(\tau Bn_K^{0.5})$  and  $\alpha_s^{\text{GCT}}(\tau Bn_K^{0.5})$  for  $\lambda$  in  $[0.3, 0.9]$

do

compute difference  $\alpha_s^{\text{sim}}(\tau B n_K^{0.5})$  and  $\lambda[\alpha_s^{\text{GCT}}(\tau B n_K^{0.5}) - 1] + 1$

done

The minimum difference between  $\alpha_s^{\text{sim}}(\tau B n_K^{0.5})$  and  $\lambda[\alpha_s^{\text{GCT}}(\tau B n_K^{0.5}) - 1] + 1$  is chosen as the difference between  $\alpha_s^{\text{GCT}}(\tau B n_K^{0.5})$  and  $\alpha_s^{\text{sim}}(\tau B n_K^{0.5})$

done

done

The parameters  $(B, w)$  that yield the minimal difference between  $\alpha_s^{\text{GCT}}(\tau B n_K^{0.5})$  and  $\alpha_s^{\text{sim}}(\tau B n_K^{0.5})$  is used for the system.

## B. Pseudo code for Approach 2:

$w$  in  $[w_{\min}, w_{\max}]$

do

Get  $\alpha_s^{\text{GCT}}(\tau B n_K^{0.5})$  for the given  $w$ ;

Get the position for the saddle point, namely the value of  $\frac{(T^* - T_\theta)}{T^*} B n_K^{0.5} = a$  for  $T^*$  in  $[T_{\min}, T_\theta]$ ,

do

Compute  $B$  based the value of  $\frac{(T^* - T_\theta)}{T^*} B n_K^{0.5} = a$

Compute  $\alpha_s^{\text{sim}}(\tau B n_K^{0.5})$  for a given  $B$  and  $w$ ;

Use the method in Approach 1 to calculate the difference between  $\alpha_s^{\text{GCT}}(\tau B n_K^{0.5})$  and  $\alpha_s^{\text{sim}}(\tau B n_K^{0.5})$ ;

done

done

Again, the parameters  $(B, w)$  that yield the minimal difference between  $\alpha_s^{\text{GCT}}(\tau B n_K^{0.5})$  and  $\alpha_s^{\text{sim}}(\tau B n_K^{0.5})$  is used for the system.

**Table S1. Parameters for the temperature dependent free energy of solvation**

| <b>Unit of interest</b> | <b>Reference temperature <math>T_0</math> (K)</b> | <b>Reference free energy of solvation <math>\Delta G_{\text{FES}}(T_0)</math> kcal/mol</b> | <b>Enthalpy of solvation <math>\Delta H_{\text{FES}}</math> kcal/mol</b> | <b>Heat capacity of solvation <math>\Delta C_P</math> cal/mol-K</b> |
|-------------------------|---------------------------------------------------|--------------------------------------------------------------------------------------------|--------------------------------------------------------------------------|---------------------------------------------------------------------|
| <b>Backbone</b>         | 298                                               | -10.1                                                                                      | -17.0                                                                    | 4.00                                                                |
| <b>Thr</b>              | 298                                               | -5.0                                                                                       | -12.5                                                                    | 4.66                                                                |
| <b>Pro</b>              | 298                                               | 2.0                                                                                        | -5.4                                                                     | 7.05                                                                |
| <b>Lys</b>              | 298                                               | -100.9                                                                                     | -111.8                                                                   | 5.08                                                                |
| <b>Ala</b>              | 298                                               | 1.9                                                                                        | -3.3                                                                     | 4.96                                                                |
| <b>Met</b>              | 298                                               | 1.4                                                                                        | -10.0                                                                    | 5.59                                                                |

**Table S2. Details of all-atom simulation parameters for each system**

| <b>System</b>          | <b>Number of replicas</b> | <b>Temperature schedule</b>                                                                | <b>Number of independent simulations</b> |
|------------------------|---------------------------|--------------------------------------------------------------------------------------------|------------------------------------------|
| Q <sub>20</sub>        | 18                        | 280, 290, 300, 310, 320, 330, 340, 350, 360, 370, 380, 390, 400, 410, 420, 430, 440, 450 K | 4                                        |
| Q <sub>30</sub>        |                           |                                                                                            |                                          |
| Q <sub>40</sub>        |                           |                                                                                            |                                          |
| Q <sub>50</sub>        |                           |                                                                                            |                                          |
| Q <sub>60</sub>        |                           |                                                                                            |                                          |
| Q <sub>70</sub>        |                           |                                                                                            |                                          |
| (QGQSPYG) <sub>9</sub> |                           |                                                                                            |                                          |
| (TPKAMAP) <sub>9</sub> | 18                        | 300, 310, 320, 330, 340, 350, 360, 370, 380, 390, 400, 420, 440, 460, 480, 500, 520, 540 K | 3                                        |

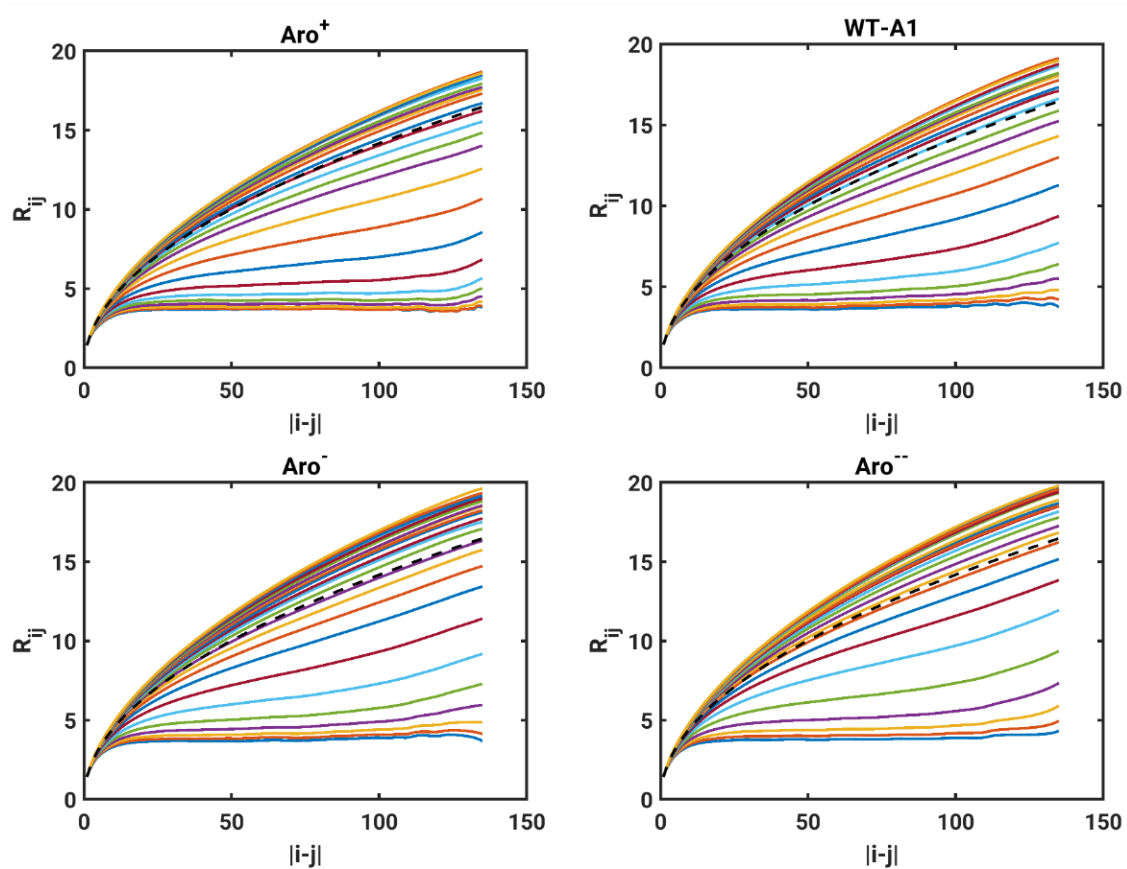

**Figure S2. Internal scaling distance for Aro<sup>+</sup>, WT-A1, Aro<sup>-</sup>, and Aro<sup>-</sup> variants.** Dashed line denotes the reference internal scaling profile:  $\langle\langle R_{ij} \rangle\rangle = R_0 |j-i|^{0.5}$ . Here,  $R_0$  is the average value obtained across all the temperatures when we set  $|j-i| = 1$ .

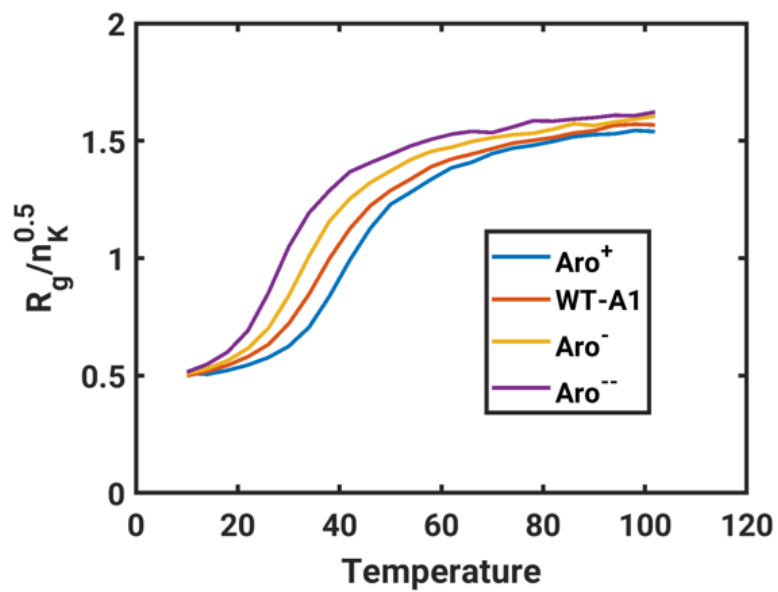

Figure S3. Plot of normalized  $R_g$  for Aro<sup>+</sup>, WT-A1, Aro<sup>-</sup>, and Aro<sup>--</sup>.

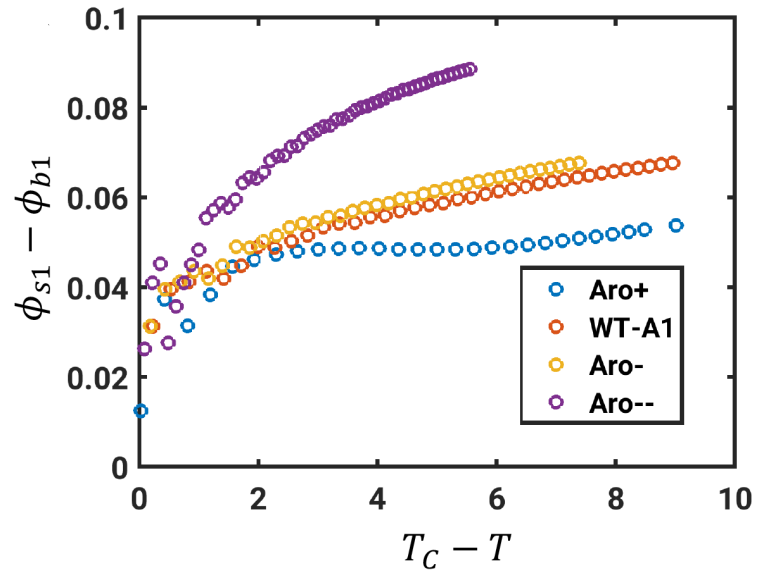

**Figure S4: Analysis of how the width of the metastable regime  $\Delta\phi_m(T)$  varies with  $(T - T_c)$  for each of the four sequences, Aro<sup>+</sup>, WT-A1, Aro<sup>-</sup>, and Aro<sup>--</sup>.**



### Sensitivity analysis for estimates of $B$ and $w$

WT-A1 is used to test the robustness of the fitting result. There are 11 sampled temperatures below  $T_\theta$  for A1-WT. The robustness is tested as following:

- a) A subset of the 11 sampled temperatures which contains  $N$  randomly non-repeating temperatures is chosen at random.
- b) This subset is used to fit  $B$  and  $w$ .
- c) For each  $N$  in  $[5, 10]$ , repeat a) and b) 10 times, and then get the mean value of  $B$  and  $w$ :  $B_N^{\text{mean}}$  and  $w_N^{\text{mean}}$ , and the corresponding standard deviation  $B_N^{\text{std}}$  and  $w_N^{\text{std}}$ .
- d) Plot  $B_N^{\text{mean}}$  and  $w_N^{\text{mean}}$  as a function of  $N$ .  $B_N^{\text{std}}$  and  $w_N^{\text{std}}$  are plotted as the error bar. A complete analysis from a) to d) is denoted as one trial.
- e) Repeat a)-d) 4 times, namely, perform 4 trial analysis.

Results are shown in **Figure S5**. Black dashed line indicates  $B$  or  $w$  fitted by using all the data. The fitting result becomes convergent when  $N > 6$ .

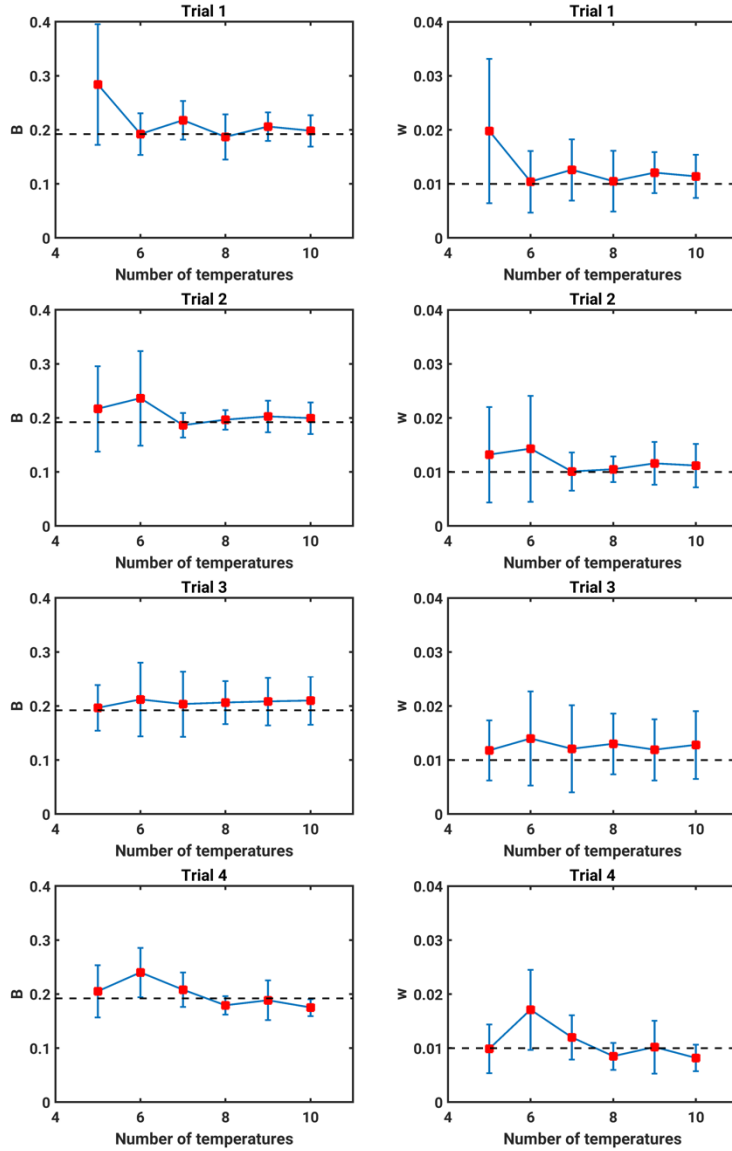

**Figure S5: Sensitivity analysis of for estimates of  $B$  and  $w$ .** Red square indicates the mean values of  $B$  or  $w$  for the subset with same number of sampled temperatures. Error bar indicates the stand deviation. Black dashed line indicates  $B$  or  $w$  fitted by using all the data.

## Fitting result by using different $T^*$

We assess the impact of different values of  $T^*$  on the fitting procedure used to obtain  $B$  and  $w$ . The set of parameters  $\{T^*, B, w\}$  that best fits the contraction ratio profile from simulation ( $\alpha_s^{\text{sim}}$ ) is chosen as the final parameter to calculate the phase diagram. The searching range for  $T^*$  is  $\left[ T|_{\alpha_s^{\text{sim}}=0.5(1+\min(\alpha_s^{\text{sim}}))} - 10, T|_{\alpha_s^{\text{sim}}=0.5(1+\min(\alpha_s^{\text{sim}}))} + 10 \right]$ . Here,  $\min(\alpha_s^{\text{sim}})$  is the minimum value of the contraction ratio from the simulations. For the UCST system,  $\min(\alpha_s^{\text{sim}})$  is the contraction ratio at the lowest sampled temperature. For the LCST system, it is the value of the contraction ratio at the highest sampled temperature. **Figure S6** shows the fitting result by using different  $T^*$  for WT-A1 system. Approach 2 in Figure S1 is used for the fitting process.

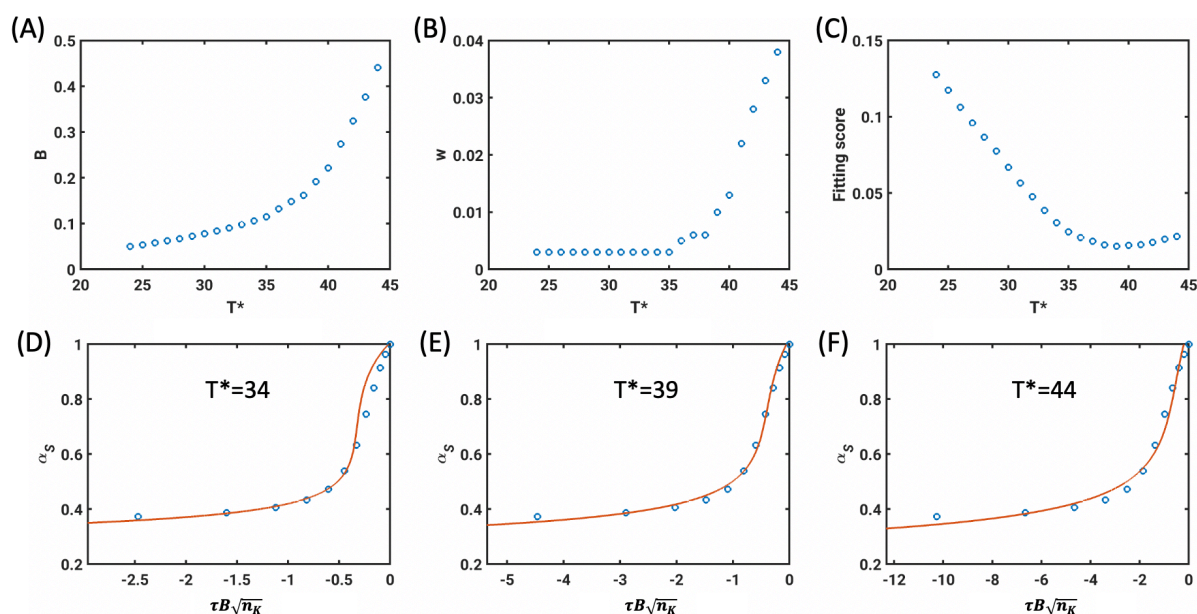

**Figure S6: Fitting result by using different  $T^*$  for WT-A1 system.** (A)-(C)  $B$ ,  $w$  and the fitting score as a function of  $T^*$ . The fitting function is defined as the mean absolute difference between  $\alpha_s^{\text{simul}}$  and  $\alpha_s^{\text{GCT}}$ , detailed information about calculating the difference between  $\alpha_s^{\text{simul}}$  and  $\alpha_s^{\text{GCT}}$  can be found in **Figure S1**.  $T^* = 39$  has the minimum fitting score, thus  $B$  and  $w$  fitted from  $T^* = 39$  are chosen as the final parameter to calculate the phase diagram. (D)-(F) Comparison of  $\alpha_s^{\text{simul}}$  and  $\alpha_s^{\text{GCT}}$  at different  $T^*$ .
